# Supplementary material
Source: publisher site journal article supplement (https://www.dovepress.com/article/321212)

## **Type 2 Inflammatory Disease Burden Among Asthma Patients and its Association With Asthma-Related Outcomes**

David Price, Andrew Menzies-Gow, Claus Bachert, Giorgio Walter Canonica, Janwillem Kocks, Asif H. Khan, Fen Ye, Paul Rowe, Yufang Lu, Siddhesh Kamat, Victoria Carter, Jaco Voorham

### **Supplementary figure**

**Figure S1.** Likelihood ratios for co-occurrence of type 2 inflammatory diseases in all asthma patients with **(A)** food allergy, **(B)** anaphylaxis, **(C)** nasal polyps, **(D)** allergic conjunctivitis, **(E)** allergic rhinitis, **(F)** chronic rhinosinusitis, **(G)** eczema, and **(H)** urticaria

**A**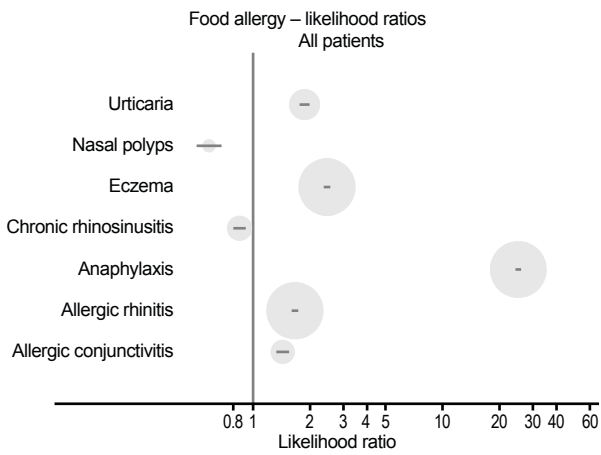**B**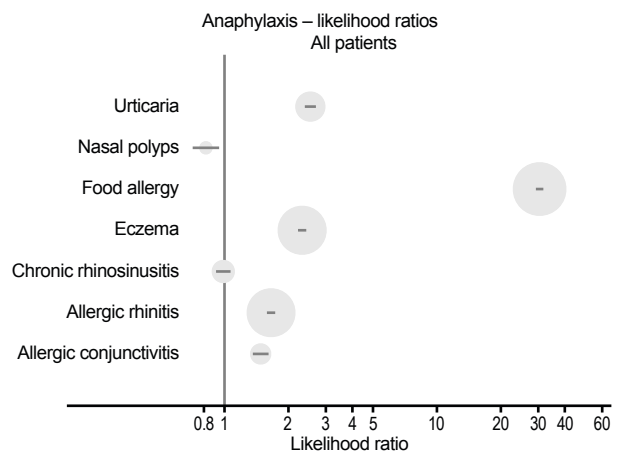**C**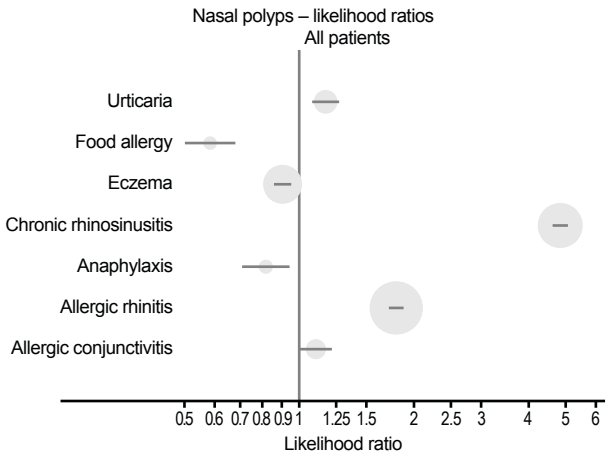**D**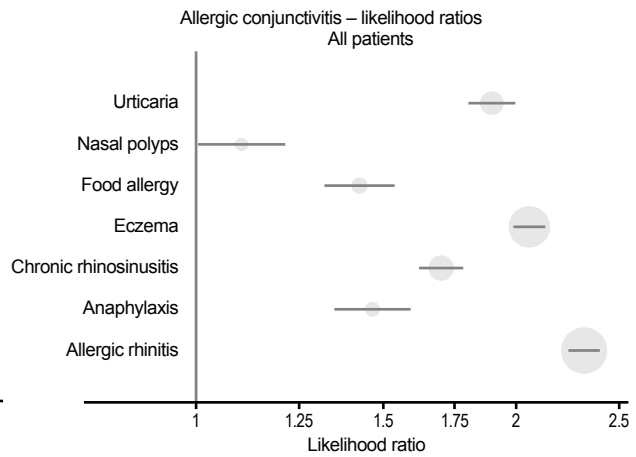**E**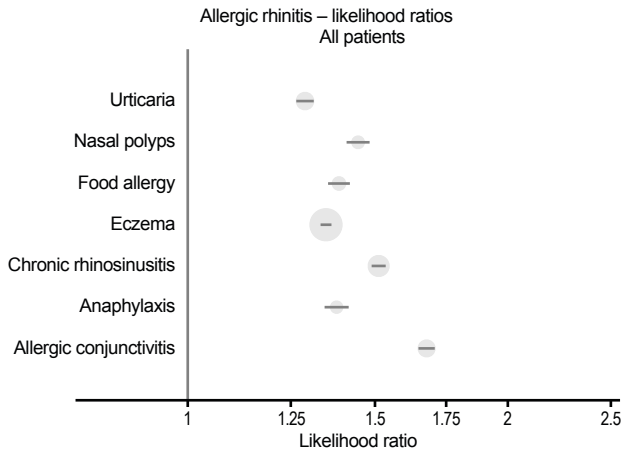**F**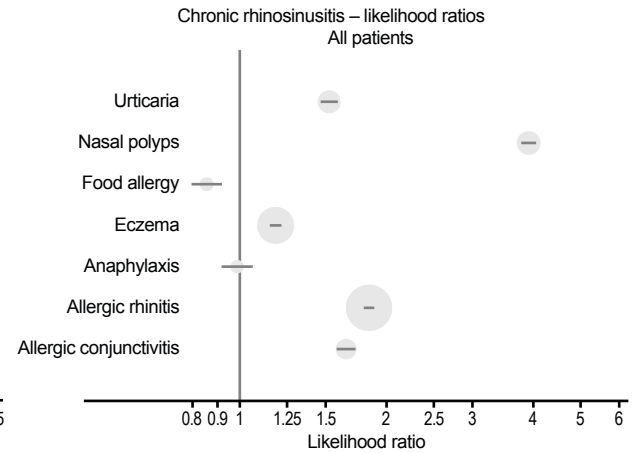**G**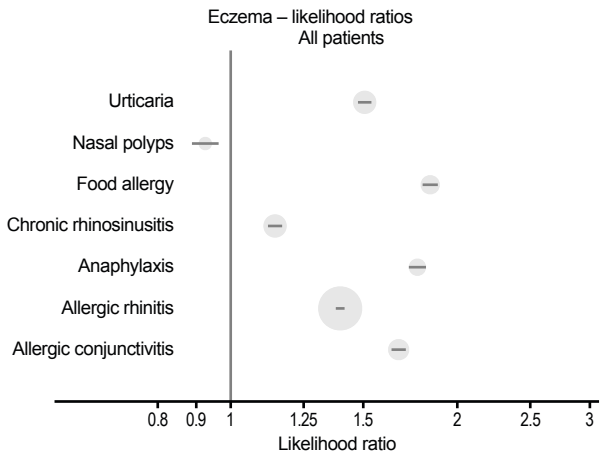**H**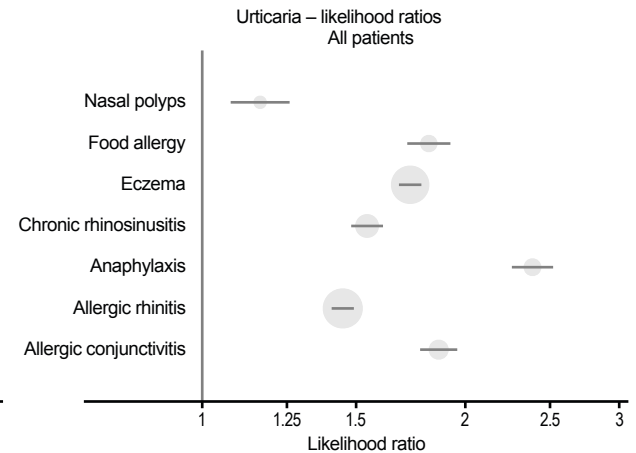

Supplement: Supplementary file 1 [file get_supplementary_file.php]
